# Supplementary material
Source: publisher figshare collection journal article supplement (https://asha.figshare.com/articles/dataset/_/6118817)
Supplement: Supplementary file 1 [file 1]

| <b>Fixed effects</b> | <b>Estimate</b> | <b><i>SE</i></b> | <b><i>t</i></b> |
|----------------------|-----------------|------------------|-----------------|
| (Intercept)          | 7.14            | 0.66             | 10.81           |
| Directed (NHD)       | −0.28           | 0.09             | −2.96           |
| Age                  | −0.16           | 0.06             | −2.98           |

**Supplemental Material S5.** Fixed effects for the best-fit model for F1 range. Number of observations: 32; number of participants: 16.  
NHD = normal hearing-directed.
