# Supplementary material
Source: publisher figshare collection journal article supplement (https://asha.figshare.com/articles/dataset/_/6118817)
Supplement: Supplementary file 2 [file 1]

| <b>Fixed effects</b> | <b>Estimate</b> | <b><i>SE</i></b> | <b><i>t</i></b> |
|----------------------|-----------------|------------------|-----------------|
| (Intercept)          | 34.02           | 4.31             | 7.89            |
| Directed (NHD)       | -1.92           | 0.52             | -3.71           |
| Age                  | -0.96           | 0.36             | -2.67           |

**Supplemental Material S4.** Fixed effects for the best-fit model for vowel space area. Number of observations: 32; number of participants: 16.  
NHD = normal hearing-directed.
