# Supplementary material
Source: publisher figshare collection journal article supplement (https://asha.figshare.com/articles/dataset/_/6118817)
Supplement: Supplementary file 3 [file 1]

| <b>Fixed effects</b> | <b>Estimate</b> | <b><i>SE</i></b> | <b><i>t</i></b> |
|----------------------|-----------------|------------------|-----------------|
| (Intercept)          | 80.92           | 18.88            | 4.29            |
| Pair type (NH–NH)    | –19.50          | 5.52             | –3.54           |
| Pair age             | –3.17           | 1.57             | –2.02           |

**Supplemental Material S1.** Fixed effects for the best-fit model for task transaction time. Number of observations: 82; number of different pairs: 25. NH = normal hearing.
