# Supplementary material
Source: publisher figshare collection journal article supplement (https://asha.figshare.com/articles/dataset/_/6118817)
Supplement: Supplementary file 4 [file 1]

| <b>Fixed effects</b> | <b>Estimate</b> | <b><i>SE</i></b> | <b><i>t</i></b> |
|----------------------|-----------------|------------------|-----------------|
| (Intercept)          | 5.53            | 0.11             | 49.92           |
| Directed (NHD)       | −0.040          | 0.024            | −1.67           |
| Age                  | −0.027          | 0.009            | −2.99           |

**Supplemental Material S8.** Fixed effects for the best-fit model for lexical frequency. Number of observations: 111; number of participants: 16.  
NHD = normal-hearing directed.
