# Supplementary material
Source: publisher figshare collection journal article supplement (https://asha.figshare.com/articles/dataset/_/6118817)
Supplement: Supplementary file 5 [file 1]

| <b>Fixed effects</b> | <b>Estimate</b> | <b><i>SE</i></b> | <b><i>t</i></b> |
|----------------------|-----------------|------------------|-----------------|
| (Intercept)          | 4.12            | 0.20             | 20.33           |
| Directed (NHD)       | 0.42            | 0.18             | 2.34            |

**Supplemental Material S7.** Fixed effects for the best-fit model for words per phrase. Number of observations: 110; number of participants: 16.  
NHD = normal hearing-directed.
