# Supplementary material
Source: publisher figshare collection journal article supplement (https://asha.figshare.com/articles/dataset/_/6118817)
Supplement: Supplementary file 6 [file 1]

| <b>Fixed effects</b> | <b>Estimate</b> | <b><i>SE</i></b> | <b><i>t</i></b> |
|----------------------|-----------------|------------------|-----------------|
| (Intercept)          | 9.17            | 0.14             | 65.47           |
| Directed (NHD)       | −0.29           | 0.14             | −2.13           |

**Supplemental Material S6.** Fixed effects for the best-fit model for F2 range. Number of observations: 32; number of participants: 16.  
NHD = normal hearing-directed.
