# Supplementary material
Source: publisher figshare collection journal article supplement (https://asha.figshare.com/articles/dataset/_/6118817)
Supplement: Supplementary file 7 [file 1]

| <b>Fixed effects</b> | <b>Estimate</b> | <b><i>SE</i></b> | <b><i>t</i></b> |
|----------------------|-----------------|------------------|-----------------|
| (Intercept)          | 72.19           | 2.66             | 27.10           |
| Directed (NHD)       | −1.80           | 0.27             | −6.62           |
| Age                  | −0.69           | 0.22             | −3.12           |

**Supplemental Material S3.** Fixed effects for the best-fit model for mean energy 1–3 k Hz. Number of observations: 111; number of participants: 16. NHD = normal hearing-directed.
