# Supplementary material
Source: publisher figshare collection journal article supplement (https://asha.figshare.com/articles/dataset/_/6118817)
Supplement: Supplementary file 8 [file 1]

| <b>Fixed effects</b> | <b>Estimate</b> | <b><i>SE</i></b> | <b><i>t</i></b> |
|----------------------|-----------------|------------------|-----------------|
| (Intercept)          | 5.03            | 0.87             | 5.79            |
| Directed (NHD)       | −0.52           | 0.15             | −3.47           |
| Age                  | −0.15           | 0.07             | −2.07           |

**Supplemental Material S2.** Fixed effects for the best-fit model for F0 range. Number of observations: 107; number of participants: 16.  
NHD = normal hearing-directed.
